# Supplementary material for: Vanadium-substituted heteropolyacids (H3+mPW12−mVmO40) encapsulated in Fe3O4@UiO-66 magnetic core–shell microspheres as excellent catalysts for oxidative desulfurization under oxygen
Source: Royal Society of Chemistry journal article supplement (doi:10.1039/d0nj05926a), 2021-01-01
Supplement: d0nj05926a1.pdf [file d0nj05926a1.pdf]

## Supporting Information

### **Vanadium substituted heteropolyacids ( $H_{3+m}PW_{12-m}V_mO_{40}$ ) encapsulated into $Fe_3O_4@UiO-66$ magnetic core-shell microspheres as brilliant catalysts for oxidative desulfurization under oxygen**

**Chaowei Wang<sup>a</sup>, Zhe Liu<sup>a</sup>, Guangfa Hu<sup>b</sup>, Ruimin Gao<sup>b</sup>, Jianshe Zhao<sup>a\*</sup>**

<sup>a</sup> Key Laboratory of Synthetic and Natural Functional Molecule Chemistry of Ministry of Education, Shaanxi Key Laboratory of Physico-Inorganic Chemistry, National Demonstration Center for Experimental Chemistry Education, College of Chemistry & Materials Science, Northwest University, Xi'an 710069, China

<sup>b</sup> Research Institute of Shaanxi Yanchang Petroleum Group Corp. Ltd., Xi'an 710075, China

\*Corresponding author.

E-mail: jszhao@nwu.edu.cn

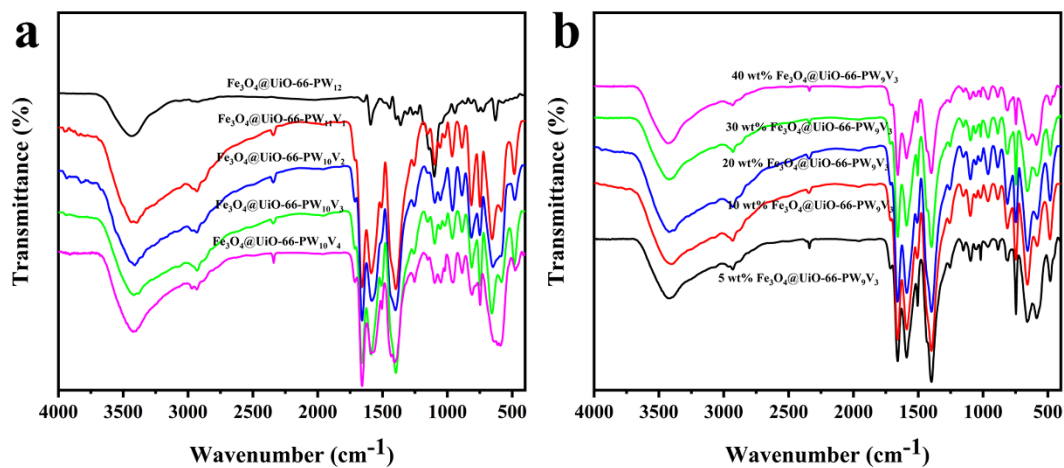

**Fig. S1.** FT-IR spectra of (a) the loading different HPA catalysts  $\text{Fe}_3\text{O}_4@\text{UiO-66-HPA}$ , and (b) the different HPA loading amount catalysts  $\text{Fe}_3\text{O}_4@\text{UiO-66-PW}_9\text{V}_3$ .

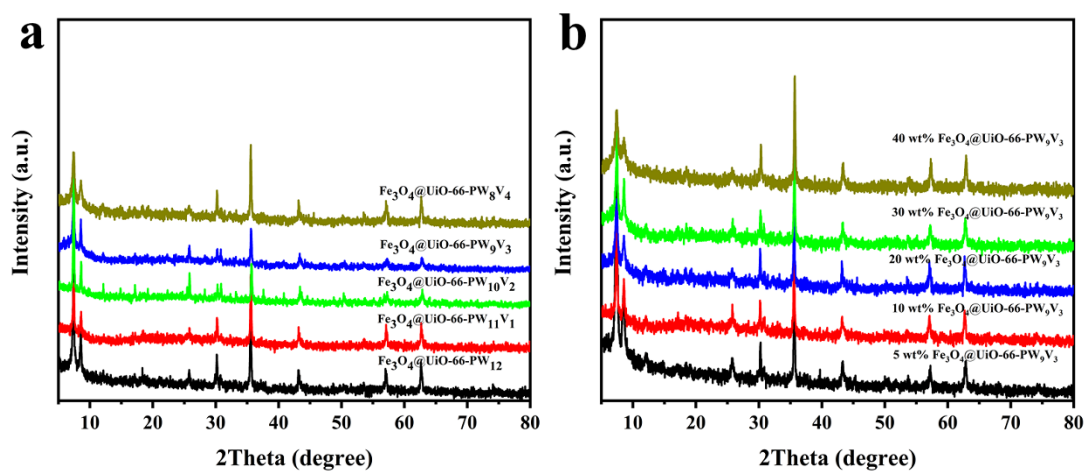

**Fig. S2.** XRD patterns of (a) the loading different HPA catalysts  $\text{Fe}_3\text{O}_4@\text{UiO-66-HPA}$ , and (b) the different HPA loading amount catalysts  $\text{Fe}_3\text{O}_4@\text{UiO-66-PW}_9\text{V}_3$ .

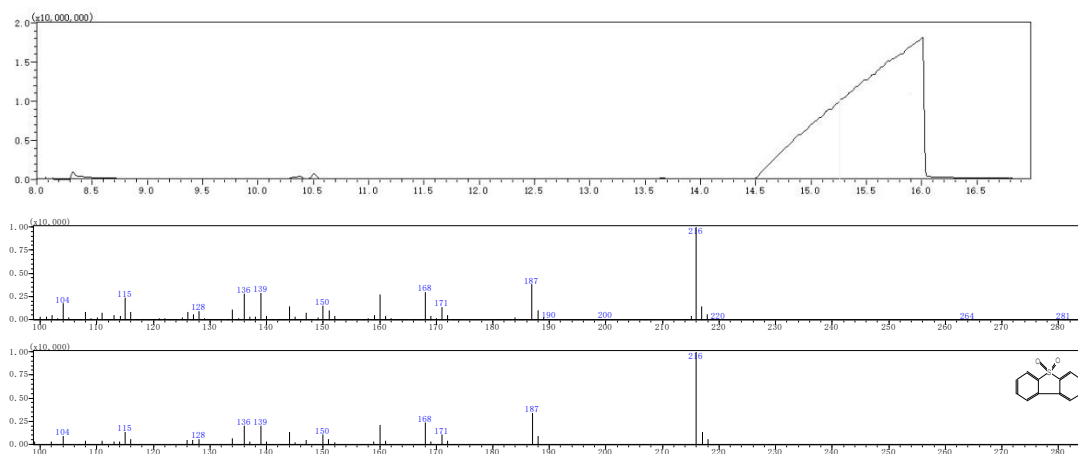

**Fig. S3.** The GC-MS analysis of the product extracted by  $\text{CH}_3\text{CN}$  after ODS.

**Table S1.** ICP data of different catalysts.

| Catalyst                                                                      | W (wt%) | V (wt%) | W/V (mol ratio) | HPA (wt%) |
|-------------------------------------------------------------------------------|---------|---------|-----------------|-----------|
| 5 wt% Fe <sub>3</sub> O <sub>4</sub> @UiO-66-PW <sub>9</sub> V <sub>3</sub>   | 2.81    | 0.26    | 2.99            | 4.68      |
| 10% wt% Fe <sub>3</sub> O <sub>4</sub> @UiO-66-PW <sub>9</sub> V <sub>3</sub> | 5.83    | 0.53    | 3.03            | 9.72      |
| 20% wt% Fe <sub>3</sub> O <sub>4</sub> @UiO-66-PW <sub>9</sub> V <sub>3</sub> | 11.54   | 1.06    | 3.02            | 19.23     |
| 30% wt% Fe <sub>3</sub> O <sub>4</sub> @UiO-66-PW <sub>9</sub> V <sub>3</sub> | 15.93   | 1.46    | 3.02            | 26.55     |
| 40% wt% Fe <sub>3</sub> O <sub>4</sub> @UiO-66-PW <sub>9</sub> V <sub>3</sub> | 20.50   | 1.88    | 3.01            | 34.16     |
| After used 10 times                                                           | 10.97   | 1.01    | 3.00            | 17.37     |

**Table S2.** The comparison between ODS results of different HPA based catalysts.

| Catalyst                                                                    | Oxidant                       | Temperature<br>(°C) | Time<br>(min) | DBT conversion<br>(%) | Reference |
|-----------------------------------------------------------------------------|-------------------------------|---------------------|---------------|-----------------------|-----------|
| MoV/Zr/SBA                                                                  | TBHP                          | 60                  | 75            | 98.5                  | S1        |
| HPA-PMI <sub>n</sub> <sup>a</sup>                                           | H <sub>2</sub> O <sub>2</sub> | 50                  | 120           | 98.9                  | S2        |
| [Co(BBPTZ) <sub>3</sub> ][HPMo <sub>12</sub> O <sub>40</sub> ] <sup>b</sup> | TBHP                          | 50                  | 480           | 99.16                 | S3        |
| PTA@MIL-101(Cr)                                                             | H <sub>2</sub> O <sub>2</sub> | 50                  | 120           | 99                    | S4        |
| Co-POM@MOF-199@MCM-41                                                       | O <sub>2</sub>                | 80                  | 160           | 99.1                  | S5        |
| K <sub>6</sub> P <sub>2</sub> W <sub>18</sub> O <sub>62</sub> /GO           | air                           | 60                  | 300           | 96.10                 | S6        |
| Fe <sub>3</sub> O <sub>4</sub> @UiO-66-PW <sub>9</sub> V <sub>3</sub>       | O <sub>2</sub>                | 60                  | 180           | 99.85                 | this work |

<sup>a</sup> This catalyst represents a porous nanoflower catalyst self-assembled from HPA and polyionene denominated poly(2, p-methylphenylionene) (PMI<sub>n</sub>).

<sup>b</sup> This catalyst says a cationic triazole-based MOF encapsulating HPA, BBPTZ=4,4-bis(1,2,4-triazol-1-ylmethyl)biphenyl].

#### Reference

S1 M. Chamack, A. Mahjoub and H. Aghayan, *Chem. Eng. Res. Des.*, 2015, **94**, 565-572.

S2 L. Zhang, S. Song and N. Yang, *Ind. Eng. Chem. Res.*, 2019, **58**, 3618-3629.

S3 X. Hao, Y. Ma and H. Zang, *Chem. -Eur. J.*, 2015, **21**(9), 3778-3784.

S4 X. Hu, Y. Lu and F. Dai, *Microporous Mesoporous Mater.*, 2013, **170**, 36-44.

S5 S. Li, J. Li and Y. Gao, *Fuel*, 2017, **197**, 551-561.

S6 S. Dou and R. Wang, *New J. Chem.*, 2019, **43**, 3226-3235.
